# Supplementary material
Source: PubMed Central journal article supplement (PMC5826881)
Supplement: NIHMS927565-supplement-supplement_1.pdf [file NIHMS927565-supplement-supplement_1.pdf]

## **Figure Legends**

**Figure 1.** Study Flow Diagram. \*9 in before group and 6 in after group declined to answer what they did with excess medication; \*\*Brochure recommended methods of disposal include throwing away in the trash with an unpalatable substance or returning to police or pharmacy

**eFigure1.** Educational Brochure. Reprinted courtesy of the Division of Plastic and Reconstructive Surgery, Washington University, St Louis, MO

**eFigure2.** Study Questionnaire. Reprinted courtesy of the Division of Plastic and Reconstructive Surgery, Washington University, St Louis, MO

**eFigure3.** Improved Educational Brochure with Single Method of Disposal. Reprinted courtesy of the Division of Plastic and Reconstructive Surgery, Washington University, St Louis, MO

## The Solution

We can ALL be involved!

- ❖ **Physicians** can prescribe appropriate amount of narcotic pain medication following surgery.
- ❖ **Medical staff** can increase education on proper disposal of narcotic pain medication.
- ❖ **Patients** can commit to properly disposing of leftover prescription narcotic pain medication.

### Options for disposal:

Drug disposal at designated locations.

Use the following links to help find a location nearby:  
[www.deadiversion.usdoj.gov/drug\\_disposal](http://www.deadiversion.usdoj.gov/drug_disposal)  
[www.americanmedicinechest.com](http://www.americanmedicinechest.com)  
[www.disposemymeds.org](http://www.disposemymeds.org)  
[www.rxdrugdropbox.org](http://www.rxdrugdropbox.org)

**Self-disposal at home is another option.**

## How to Dispose of Narcotics Properly at Home.

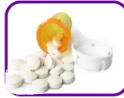

**Remove** medication from the original container.

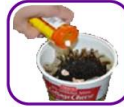

**Mix** with undesirable household substance:

- ❖ **Coffee Grounds**
- ❖ **Dirt**
- ❖ **Kitty Litter**
- ❖ **Dish Detergent**

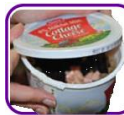

**Place** into a non-transparent container with a lid or sealable bag.

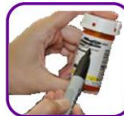

**Conceal** all personal information on the original medicine bottle (marker or scratch off)

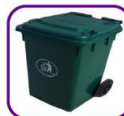

**Dispose** of the sealed container and medicine bottles in the trash!

# Combating the Opioid Epidemic

**YOU** can help us solve a growing problem!

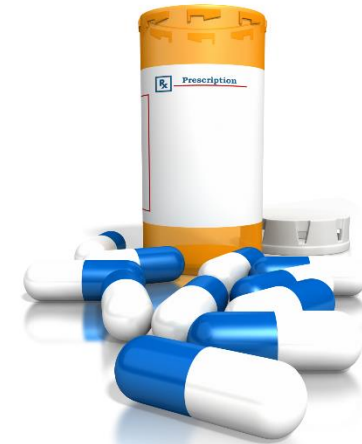

Division of Plastic &  
Reconstructive Surgery

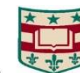

Washington  
University in St. Louis

## The Problem

- ❖ Opioids are the **primary cause of overdose** in the US and **more opioids are prescribed** in the US than any other country.
- ❖ **33,000 deaths** in 2015 attributed to opioid overdose, **more than from heroin or cocaine combined.**
- ❖ Legitimate use of prescribed opioids can lead to **dependence, abuse, and addiction.**
- ❖ **Abuse by young persons** often starts at a party or with friends after being stolen from family members' prescription bottles.
- ❖ Many heroin users state that opioid medication use **preceded their use of heroin.**
- ❖ 2015 deaths from heroin exceeded those from gun homicides, **increasing 248% from 2010 - 2014.**
- ❖ In 2016, the CDC reported **91 people in the United States die every day from opioid overdoses.**

This cycle of over-prescribing and improper disposal holds true **here at home** as is illustrated below:

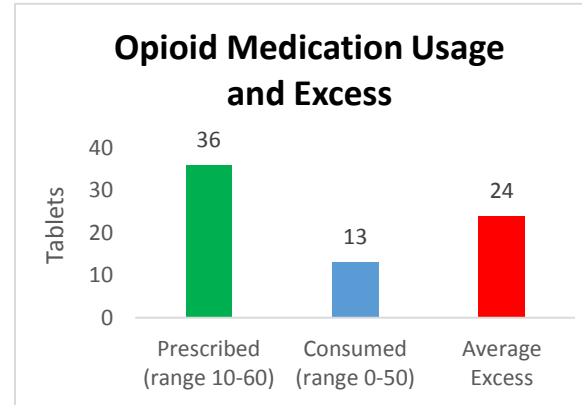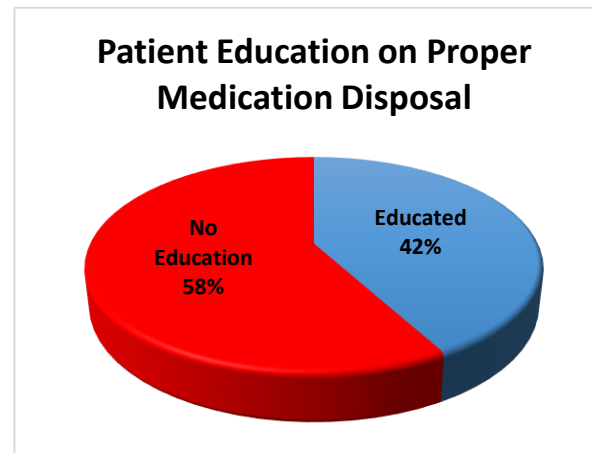

Based on a narcotic usage study performed on surgical patients at the Washington University Hospitals from Apr-Dec 2016

## So, what happens to these leftover narcotic pain medications?

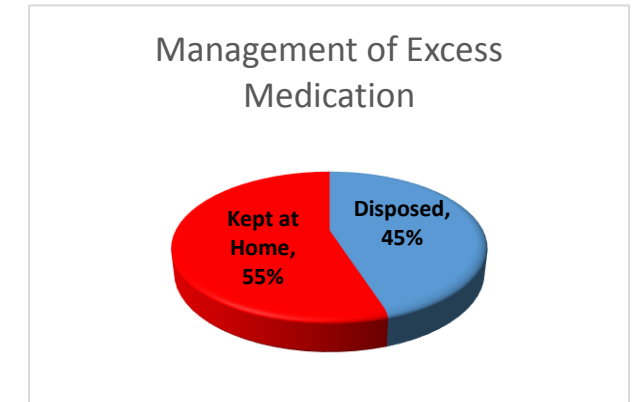

Questionnaire results of those who stated they were educated on proper medication disposal

### Conclusions:

1. Pain medications are often overprescribed.
2. Education on proper disposal of narcotic medications is lacking.
3. Even when educated, patients often do not dispose of medications properly.
4. Options are available to dispose of these abusive medications easily and responsibly!

 Washington  
University in St. Louis

Phone: 314-362-7388

Fax: 314-367-0225

If you have completed this survey at a previous visit, please **DO NOT** fill out today.

## OPIOID MEDICATION QUESTIONNAIRE

Year of birth: \_\_\_\_\_

Gender:

- Male
- Female
- Other/Decline

Approximately, how long has it been since your surgery?

- 2 weeks
- > 2 weeks but less than one month
- ≥ one month but less than 3 months
- ≥ 3 months

Did you receive the following educational brochure (see picture) regarding opioid medication?

- Yes
- No

Were you taking opioid/narcotic medication before surgery?

- Yes – **STOP** questionnaire. Thank you.
- No- Continue to next question.

Did you use all of your prescribed opioid medication following your surgery?

- Yes - **STOP** questionnaire. Thank you.
- No – Continue to next question.

Did you keep the excess medication?

- Yes – **STOP** questionnaire. Thank you.
- No – Continue to next question.

What did you do with the excess medication?

- Disposed of medication (please check a below box):
  - Threw away in garbage
  - Flushed down the toilet
  - Returned to the police
  - Returned to the pharmacy
  - Other mechanism: \_\_\_\_\_
- Pass medication on to a friend or relative.
- Other/Decline

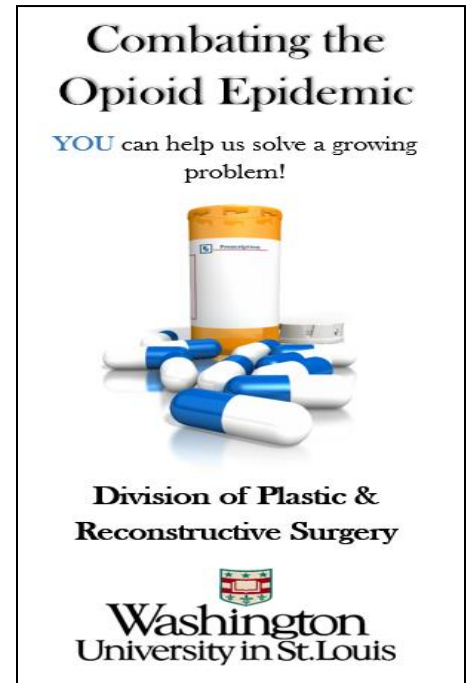

---

Thank you for your participation. We appreciate your efforts.

# Be RESPONSIBLE...

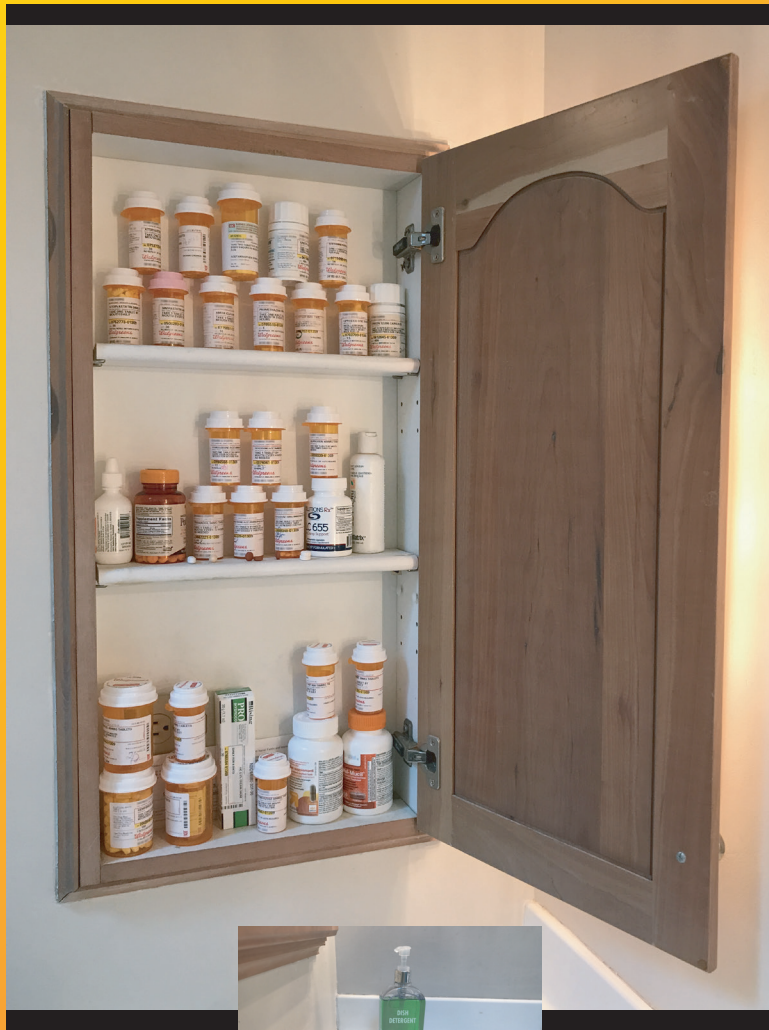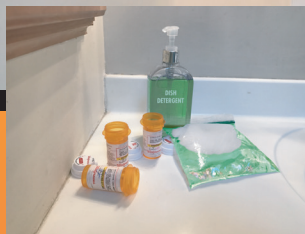

**...get rid of your left over pain medications!**

(See how on reverse side)

## 3 Easy Steps To Dispose Unused Pain Medications:

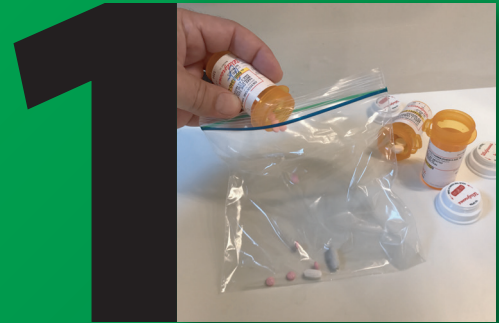

**BAG**

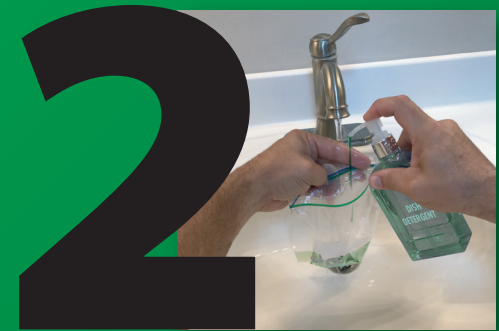

**DISH SOAP**

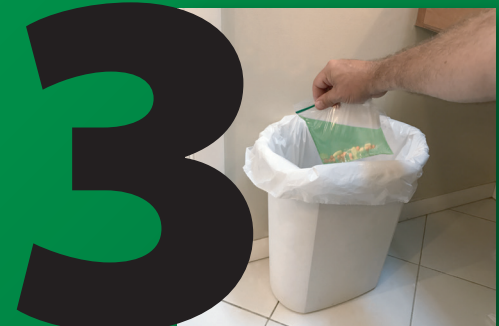

**TRASH**

Courtesy of:  
National Zip-Out Unused Opioids Foundation  
Copyright © 2017 All Rights Reserved
